# Supplementary material for: Using a mentorship model to localise the Practical Approach to Care Kit (PACK): from South Africa to Ethiopia
Source: PubMed Central journal article supplement — BMJ Glob Health. 2018 Nov 16;3(Suppl 5):e001108. doi: 10.1136/bmjgh-2018-001108 (PMC6241984; doi:10.1136/bmjgh-2018-001108), 2018-11-16
Supplement: bmjgh-2018-001108supp001.pdf [file bmjgh-2018-001108supp001.pdf]

**Supplementary File 1: List of Ethiopian National Health Guidelines consulted for the development of the Ethiopian Primary Health Care Clinical Guideline**

1. FMOH, NATIONAL MALARIA GUIDELINES. Third Edition. 2012
2. FMOH, NATIONAL CONSOLIDATED GUIDELINES FOR COMPREHENSIVE HIV PREVENTION, CARE AND TREATMENT. 2017(Final Draft)
3. FMOH, Guidelines on Clinical and Programmatic Management of Major Noncommunicable Diseases. 2016.
4. FMOH, GUIDELINES ON PROGRAMMATIC MANAGEMENT OF DRUG RESISTANT TUBERCULOSIS IN ETHIOPIA. 2014.
5. FMOH, NATIONAL GUIDELINES FOR THE MANAGEMENT OF SEXUALLY TRANSMITTED INFECTIONS USING SYNDROMIC APPROACH.2016
6. FMOH, GUIDELINES FOR CLINICAL AND PROGRAMMATIC MANAGEMENT OF TB, TB/HIV AND LEPROSY IN ETHIOPIA. 2016
7. FMOH, Guidelines for the Management of Acute Malnutrition. 2016
8. FMOH, National Guideline on Adolescent, Maternal Infant and Young Child Nutrition. 2016
9. FMOH, GUIDELINES FOR THE PREVENTION AND CONTROL OF MICRONUTRIENT DEFICIENCIES in Ethiopia. 2016
10. FMOH, Pediatric Hospital Care: ETHIOPIA.2016
11. FMOH, NATIONAL EXPANDED PROGRAM ON IMMUNIZATION. 2015.
12. FMOH, National Pain Management Guideline.2007
13. FMOH, NATIONAL GUIDELINE FOR FAMILY PLANNING SERVICES IN ETHIOPIA. 2011
14. FMOH, GUIDELINE FOR IMPLEMENTATION OF A PATIENT REFERRAL SYSTEM. 2010
15. FMOH, Technical and Procedural Guidelines for Safe Abortion Services in Ethiopia. 2006
16. FMOH, LYMPHATIC FILARIASIS AND PODOCONIOSIS MORBIDITY MANAGEMENT AND DISABILITY PREVENTION GUIDELINES. 2016
17. FMOH, NATIONAL PALLIATIVE CARE GUIDELINE. 2016
18. FMOH, Guideline for diagnosis, treatment and prevention of Leishmaniasis in Ethiopia, 2013
19. EFMHACA, EMERGENCY MEDICINES LIST (EML). FIRST EDITION. 2014
20. EFMHACA, National Essential Medicine List Fifth Edition. 2014
21. EFMHACA, ETHIOPIAN MEDICINES FORMULARY. Second Edition. 2013
22. EFMHACA, List of Medicine for Health Centers. 2012
23. EFMHACA, STANDARD TREATMENT GUIDELINES FOR HEALTH CENTER.2014.
24. EFMHACA, Manual for Medicines Good Prescribing Practice. 2012
25. EPHI, Guideline on CHOLERA OUTBREAK MANAGEMENT in Ethiopia.2011
26. EPHI, National Rabies Control Manual. 2012 (Amharic)
27. EPHI, GUIDELINE ON MEASLES SURVEILLANCE AND OUTBREAK MANAGEMENT. 3RD EDITION. 2012
28. EPHI, Public Health Emergency Management Guidelines in Ethiopia.2012
29. EPHI/FMOH, Implementation Guideline for GeneXpert MTB/RIF Assay in Ethiopia.2014
